1 **Choreography of budding yeast chromosomes during the cell cycle**

2

3 Lazar-Stefanita Luciana<sup>1,2,3,4</sup>, Scolari Vittore F.<sup>1,2,3\*</sup>, Mercy Guillaume<sup>1,2,3,4\*</sup>, Thierry

4 Agnès<sup>1,2,3</sup>, Muller Héloïse<sup>1,2,3</sup>, Mozziconacci Julien<sup>5,6,#</sup>, and Koszul Romain<sup>1,2,3,#</sup>

5

6 <sup>1</sup> Institut Pasteur, Department Genomes and Genetics, Groupe Régulation

7 Spatiale des Génomes, 75015 Paris, France

8 <sup>2</sup> CNRS, UMR 3525, 75015 Paris, France

9 <sup>3</sup> Institut Pasteur, Center of Bioinformatics, Biostatistics and Integrative Biology (C3BI),

10 Paris, F-75015, France

11 <sup>4</sup> Sorbonne Universités, UPMC Univ Paris 6, Complexité du Vivant, 75005 Paris, France

12 <sup>5</sup> Sorbonne Universités, Theoretical Physics for condensed matter lab, UPMC Université Paris

13 06, 75005 Paris, France

14 <sup>6</sup> CNRS, UMR 7600, 75005 Paris, France

15

## 16 **Abstract**

17 To ensure the proper transmission of the genetic information, DNA molecules must be  
18 faithfully duplicated and segregated. These processes involve dynamic modifications of  
19 chromosomes internal structure to promote their individualization, as well as their global re-  
20 positioning into daughter cells (Guacci et al., 1994; Kleckner et al., 2014; Mizuguchi et al.,  
21 2014). In eukaryotes, these events are regulated by conserved architectural proteins, such as  
22 structural maintenance of chromosomes (SMC *i.e.* cohesin and condensin) complexes  
23 (Aragon et al., 2013a; Uhlmann, 2016). Although the roles of these factors have been actively  
24 investigated, the genome-wide chromosomal architecture and dynamics both at small and  
25 large-scales during cell division remains elusive. Here we report a comprehensive Hi-C  
26 (Dekker et al., 2002; Lieberman-Aiden et al., 2009) analysis of the dynamic changes of  
27 chromosomes structure over the *Saccharomyces cerevisiae* cell cycle. We uncover specific  
28 SMC-dependent structural transitions between the different phases of the mitotic cycle.  
29 During replication, cohesion establishment promotes the increase of long-range intra-  
30 chromosomal contacts. This process correlates with the individualization of chromosomes,  
31 which culminates at metaphase. Mitotic chromosomes are then abruptly reorganized in  
32 anaphase by the mechanical forces exerted by the mitotic spindle on the centromere cluster.  
33 The formation of a condensin-dependent loop, that bridges centromere cluster with the cen-  
34 proximal flanking region of the rDNA, suggests that these forces may directly facilitate  
35 nucleolus segregation. This work provides a comprehensive overview of chromosome  
36 dynamics during the cell cycle of a unicellular eukaryote that recapitulates and unveils new  
37 features of highly conserved stages of the cell division.

38

39

## 40 **Introduction**

41 The improper coordination of chromosomes condensation and segregation can lead to  
42 important structural abnormalities, and result in cell death or diseases such as cancer. Pioneer  
43 studies on yeasts proved essential for the identification of genes involved in these processes.  
44 Mutations in cell-division cycle (*cdc*) (Hartwell et al., 1973) genes can block the cell cycle  
45 progression, enabling the study of global and/or local chromosome reorganization at specific  
46 cycle phases (Guacci et al., 1994; Hartwell et al., 1973; Renshaw et al., 2010; Rock and  
47 Amon, 2011; Sullivan et al., 2004; Yu, 2002). The evolutionary conserved SMC proteins bind

48 to chromosomes in spatially and temporarily regulated manners along the cycle (Aragon et al.,  
49 2013b; Renshaw et al., 2010; Uhlmann, 2016). Cohesins, such as yeast Scc1, promote sister-  
50 chromatid cohesion during DNA replication (Blat and Kleckner, 1999; Glynn et al., 2004;  
51 Laloraya et al., 2000) and get cleaved in anaphase (Stephens et al., 2011; Uhlmann et al.,  
52 1999). At this stage, condensins such as yeast Smc2 are loaded onto sister-chromatids,  
53 facilitating their segregation (Guacci et al., 1994; Hirano, 2012; Renshaw et al., 2010;  
54 Stephens et al., 2011). A recent chromosome conformation capture study on mammalian cells  
55 has provided important insights on the organization of mitotic chromosomes' internal  
56 structure (Naumova et al., 2013). However, no comprehensive analysis of the 4D dynamics of  
57 the chromosomes during an entire cell cycle has been achieved. To recapitulate and explore  
58 new features of cell cycle progression, we analyzed the internal folding and overall  
59 organization of *S. cerevisiae* eu- and heterochromatin over 20 synchronized time-points using  
60 chromosome conformation capture (Hi-C) (Dekker et al., 2002; Lieberman-Aiden et al.,  
61 2009).

62

## 63 **Results and discussion**

### 64 **Cell cycle synchronizations**

65 Hi-C libraries were generated from cell cultures synchronized in G1 with elutriation  
66 (Marbouty et al., 2014) and/or arrested at different stages of the cell cycle through  
67 thermosensitive (ts) *cdc* mutations (Fig. 1a) (Hartwell et al., 1973), sequenced, and the  
68 corresponding normalized genome-wide contact maps generated (5kb bins; Fig. 1c-d left  
69 panels; Supplementary Fig. 1; Materials and Methods) (Cournac et al., 2012). 2D maps were  
70 translated into 3D representations to visualize the main folding features (Lesne et al., 2014)  
71 (*i.e.* the centromeres and telomeres clustering in G1, Fig. 1b). Differences between two  
72 conditions were identified from log-ratio maps (50kb bins; Materials and Methods), which  
73 reflect local variations in contact frequencies. As expected, the contact map ratio of two  
74 independent G1 cell populations (experimental replicate; Fig. 1c, left panel) displays no  
75 variations. On the other hand, the ratio between exponentially growing G1 and quiescent G0  
76 cells contact maps (Fig. 1c, lower panel) highlights the formation of the telomeres hyper-  
77 cluster characteristic to this metabolic condition (Guidi et al., 2015) (Fig. 1d, black  
78 arrowheads). Multiple maps can be compared by computing their pairwise distance, showing  
79 that major changes are taking place at metaphase/anaphase transition (Fig. 1e). The overall  
80 similarities/differences between datasets is summarized using principal component analysis

81 (PCA, Fig. 1f). While experimental duplicates (such as G1, or anaphase *cdc15*) cluster  
82 together, a progression is observed between G1 (elutriated and *cdc6*), metaphase (*cdc20*) and  
83 the distant anaphase (*cdc15*).

#### 84 **Cohesins mediate chromosome compaction during S phase**

85 To decipher the chromosome structural changes that take place during replication,  
86 synchronized G1 cells were released into S-phase and Hi-C maps generated for three time-  
87 points (two replicates) (Fig. 2a; Supplementary Fig. 2; Materials and Methods). The PCA  
88 reveals a progressive structural evolution from G1 to late S/G2 phase (Fig. 2b). The  
89 dependency of the contact probability  $p$  on genomic distance  $s$ ,  $p(s)$ , reflects the internal  
90 folding of the nucleosomal fiber (Lieberman-Aiden et al., 2009; Mizuguchi et al., 2014;  
91 Naumova et al., 2013). The  $p(s)$  shows a gradual and consistent enrichment in long-range  
92 intra-chromosomal contacts (>20kb) with respect to short-range (<10kb) during replication  
93 (Fig. 2c; Supplementary Fig. 3; Materials and Methods). This change is absent when  
94 replication is impaired, although cells enter mitosis (*cdc6* ts strain (Piatti et al., 1995),  
95 Supplementary Fig. 3a). This progression stops with the completion of S-phase when it  
96 reaches the level observed in cells arrested at the G2/metaphase transition with nocodazole, a  
97 microtubule depolymerizing drug (Jacobs et al., 1988) (Fig. 2d). Interestingly, the G2/M  
98 nocodazole synchronization (Naumova et al., 2013; Sullivan et al., 2004), has a strong effect  
99 on chromosome 12 (chr12) and on the rDNA cluster structure (Supplementary Fig. 3b-c). The  
100 crossing of the  $p(s)$  slopes from the early/late replication time-points occurs around 10 – 20 kb  
101 (Fig. 2c, highlighted in gray), a value coherent with the *quasi*-periodic spacing between  
102 cohesin binding sites, ~11kb on average (Blat and Kleckner, 1999; Glynn et al., 2004). In  
103 agreement with the key role of cohesin in sister-chromatids folding during replication, Scc1  
104 (Uhlmann et al., 1999) depletion in an auxin-inducible degron *scc1-aid* strain prevents the  
105 enrichment in long-range contacts in S/G2 (Fig. 2d). This result suggests that distant cohesin  
106 binding regions may be tethered together, forming chromatin loops (Guillou et al., 2010). The  
107 Scc1-dependent reorganization of the chromatin fiber supports an individualization of the  
108 sister-chromatid pairs, supported by an overall increase in intra- contacts from 63±10% to  
109 73±4% and a decrease in inter-chromosomal contacts (Fig. 2e; see also Supplementary Fig.  
110 8). This individualization is accompanied by an increase in centromere clustering in G2 (Fig.  
111 2e, top right map yellow arrowheads; 2f). On the contrary, in *scc1* G2 cells intra contacts are  
112 decreased below G1 level (Fig. 2e, bottom left map), while the major binding sites for cohesin  
113 (*i.e.* centromeres) also exhibit a reduced level of contacts (Fig. 2f; Supplementary Fig. 4).

114 These results suggest that cohesins affect the genome organization not only in G2, through the  
115 gradual establishment of sister-chromatids cohesion and chromosome individualization, but  
116 also in G1. Although yeast chromosomes are shorter than mammalian chromosomes, they  
117 similarly change their internal conformation and individualize themselves prior entering  
118 metaphase.

### 119 **Spatial-temporal resolution of the replication program**

120 In yeast, replication initiates at discrete positions. The partially stochastic and sequential  
121 activation of these replication origins defines a population-average temporal replication  
122 program (Raghuraman et al., 2001). To illustrate the link between genome organization and  
123 replication program, the sequencing coverage of the Hi-C libraries were exploited to compute  
124 the replication timing (McCune et al., 2008; Raghuraman et al., 2001) (Supplementary Fig. 5).  
125 Three early profiles were superimposed on the S-phase chromosomal structures, generating a  
126 3D structure of the replication profile that recapitulates known properties of yeast replication  
127 and shows a “replication wave” propagating from the centromeric regions enriched in early  
128 origins onto chromosomal arms, and towards the late replicating subtelomeric regions (Fig.  
129 2g; red and blue signal, respectively).

### 130 **Chromosome dynamics during M phase**

131 After replication, cells progress through mitosis (M-phase), a stage regulated by multiple  
132 checkpoints. Notably, the regulatory protein Cdc20 is required for the metaphase/anaphase  
133 transition through the activation of the anaphase-promoting complex (APC) (Hartwell et al.,  
134 1973; Yu, 2002), while the Cdc15 kinase promotes mitotic exit by activating cytokinesis  
135 (Rock and Amon, 2011). Conditional mutants allow synchronization in metaphase (*cdc20*) or  
136 anaphase (*cdc15*). Contact maps of *cdc20*, *cdc15* and *cdc15*-arrested cells released into  
137 permissive conditions were generated to characterize chromosome reorganization throughout  
138 M-phase (Fig. 3a; Supplementary Fig. 6; Materials and Methods). PCA analysis shows that  
139 the major structural changes occur at metaphase/anaphase transition and that 60 minutes after  
140 release from the *cdc15* block, cells reenter a new round of replication, indicating a fully  
141 covered cycle (Fig. 3b). The p(s) reveals a strong increase in short-range contacts (<10-20 kb)  
142 from G2 to anaphase exceeding G1 levels and restored after anaphase completion (Fig. 3c,  
143 left panel). This increase in short-range contact is accompanied by a drop in long-range  
144 contacts, suggesting the formation of an elongated, stretched structure. Upon spindle  
145 destabilization in *cdc15*-blocked cells, the stretched chromosomal structure disappears and the  
146 two segregated chromosomal sets get closer (Fig. 3c, right panel). The latter observation is in

147 agreement with the former report of the coalescence of the two spindle pole bodies (SPB,  
148 microtubules organizing center in yeast) in presence of nocodazole in G2/M (Jacobs et al.,  
149 1988). Altogether these results suggest that constraints resisting segregation forces remain  
150 present in anaphase, possibly resulting from the cohesion of the chromosome arm extremities.  
151 The comparison of *cdc15* and *cdc20* maps shows an increase in centromere clustering in  
152 *cdc15*, leading to the formation of a prominent polymer brush structure (Daoud and Cotton,  
153 1982) (Fig. 3d, bottom left map, yellow arrowheads). Surprisingly, a chromosomal loop  
154 appears on chromosome 12 in *cdc15* arrested cells, bridging the centromere and the cen-  
155 proximal rDNA left flanking region (Fig. 3d box, pink arrowhead; 3e). Later in anaphase, the  
156 tel-proximal region of chr12R becomes completely isolated from the rest of the genome (Fig.  
157 3d, top right map). 3D representations illustrate these dramatic reorganizations of the chr12  
158 rDNA locus (3f, pink arrowheads). These results complement imaging studies showing that  
159 the rDNA exhibits a dense, line-like shape that extends throughout the nucleus at anaphase  
160 (2.1 s.d. 0.2  $\mu$ m) (Sullivan et al., 2004). Upon completion of mitosis and reentry in interphase  
161 (*cdc15*+60 min), the loop disappears (Fig. 3e). Interestingly, this loop can be seen in  
162 asynchronous populations while it is only present in anaphase (Fig. 3f, lower panel).

### 163 **Condensation is a locus specific process that occurs in anaphase**

164 The proper condensation and segregation of the rDNA cluster requires the Smc2 condensin  
165 and the nucleolar release of the Cdc14 phosphatase (Clemente-Blanco et al., 2009; D'Amours  
166 et al., 2004; Sullivan et al., 2004; Yoshida et al., 2002). We investigated the influence of both  
167 factors on rDNA organization during anaphase (Supplementary Fig. 7). Smc2 depletion in  
168 *smc2-aid cdc15* strain reduces centromere clustering in anaphase and suppresses the loop, as  
169 well as chr12R extremity isolation (Fig. 3g, bottom left map; 3i). Strikingly, *smc2 cdc15* and  
170 *cdc14* maps are similar, and the loss of centromere clustering and of the chr12 anaphase loop  
171 in both mutants reveal their epistatic relationship (Fig. 3g, upper right map, Fig. 3h). Since  
172 both mutants exhibit difficulties to complete anaphase, the condensin-dependent loop may  
173 play a direct role in the segregation of the rDNA cluster through the application of a pulling  
174 force directly onto the rDNA region.

### 175 **Conclusions**

176 A global pattern of structural changes during the cell cycle can be summarized from  
177 centromere contacts, intra/inter contact ratio and short/long contact ratio computed for each of  
178 the 20 time-points (Fig. 4). First, short/long contact ratio recapitulates the three internal  
179 folding states of chromosomes (G1, G2, and anaphase; Fig. 4; Supplementary Fig. 8). Second,

180 intra/inter contact variations reflect the successive phases of chromosome individualization  
181 and intermingling. Individualization occurs at the end of replication and peaks during  
182 anaphase resolution. Finally, the intra/inter ratio correlates strongly with centromere  
183 clustering ( $c=0.72$ ,  $p=10^{-4}$ ), with both ratios peaking during anaphase exit. A possibility is that  
184 the strengthening of polymer brush organization contributes to chromosome individualization.  
185 Overall, this comprehensive analysis of the 3D chromosome choreography during replication  
186 and segregation brings to light new perspectives regarding these fundamental processes.

187

188

## 189 **Sample preparation**

190 **Media and culture conditions.** Yeast strains used in this work are listed in [Supplementary](#)  
191 [Fig. 9](#). All strains were grown in rich medium (YPD: 1% bacto peptone (Difco), 1% bacto  
192 yeast extract (Difco) and 2% glucose), except for YKL051 (*MET3-HA-CDC20*) that was  
193 grown in synthetic complete medium deprived of methionine (SC: 0.67% yeast nitrogen base  
194 without amino acids (Difco), supplemented with a mix of amino-acids, uracil and adenine, 2%  
195 glucose). Cells were inoculated and grown overnight in 15 ml of growth medium at either  
196 30°C or 23-25°C (the later temperature corresponding to the permissive temperature of the  
197 conditional temperature-sensitive mutations *cdc6-1*, *cdc14-3* and *cdc15-2*). The next morning  
198  $2 \times 10^9$  cells of BY4741 and YKL050 strains were restarted in 150 ml fresh YPD at 30°C for  
199 2 h and fixed for Hi-C as asynchronous state. On the contrary, to obtain synchronized cell  
200 populations, 10 ml of the overnight cultures were diluted into 800 ml of the corresponding  
201 growth medium (YPD or SC) and grown overnight at 30°C or 23-25°C. Cells were then  
202 harvested through centrifugation, washed and suspended in 1X PBS, and elutriated using  
203 Beckman Avanti J-26 XP elutriation system (JE-5.0 elutriator rotor). Fractions of  
204 approximately  $1-3 \times 10^9$  G1 daughter cells were collected and eventually restarted in the  
205 adequate medium and temperature conditions so as to obtain synchronized fractions that are  
206 well-distributed across the cell cycle (see further synchronization details). On the other hand,  
207 the dataset corresponding to the quiescent state (G0) is coming from already published data in  
208 ([Guidi et al., 2015](#)), and was obtained by carbon source exhaustion.

209

210 **Synchronization with elutriation (G1 cells).** To recover G1 daughter cells, the exponential  
211 growing cultures were elutriated - a physical method of synchronization, used to separate cells



212 according to their density and sedimentation velocity (Marbouty et al., 2014). Briefly, the 800  
213 ml overnight culture was centrifuged, washed in 1X PBS and pelleted cells were suspended in  
214 1000 ml of fresh YPD for 2 h at 30°C. This additional growing step allowed cells in stationary  
215 phase to reenter exponential phase before being elutriated. For each elutriation experiment,  
216  $1.2-1.8 \times 10^{11}$  cells were washed and suspended in 30 ml of 1X PBS and injected in the 40 ml  
217 elutriation chamber at an average flow rate ranging from 20 ml/min to 25 ml/min (MasterFlex  
218 L/S pump from Cole-Parmer), at 2500 r.p.m. and 23°C. Cells were then left to equilibrate in  
219 1X PBS for 45 min at a constant flow and rotational speed. To start collecting the first  
220 fractions containing the small G1 cells, a periodic 2 ml/min increment of the flux was applied  
221 between each fraction. The resulting 600 ml fractions were centrifuged and approximately  $2.5$   
222  $\times 10^9$  G1 cells/fraction were recovered. Before fixating the G1 state, cells were suspended in  
223 fresh YPD at 30°C for 30 min, so they could recover from their stay in PBS during the  
224 elutriation. To minimize the potential variability introduced by the age heterogeneity of the  
225 bulk population, G1 daughter cells were used as starting point for all cell cycle synchrony and  
226 in combination with genetic and chemical synchronization methods (see below).

227

228 **Release into S phase.** To analyze cells undergoing replication, G1 elutriated cells were  
229 released into S phase.  $2 \times 10^9$  overnight G1 cells – belonging to the same elutriated fraction to  
230 minimize S phase restart heterogeneity – were inoculated into 150 ml YPD at 25°C (to lower  
231 the speed of the replication forks). Upon release, aliquots were sampled all over S phase till  
232 G2 with an average periodicity of 5 min. Apposite kinetics, meant to monitor the restart of the  
233 overnight G1 cells, allowed us to estimate an approximate time lag of 2h10min at 25°C  
234 required for the S phase to begin. Therefore, the restarted aliquots were fixated for Hi-C at:  
235 2h15min, 2h20min, 2h25min, 2h30min, 2h35min, 2h40min and 2h45min. The progression of  
236 each fraction throughout the S phase (from G1 to G2) was monitored with flow cytometry.

237

238 **Synchronization through thermosensitive mutations.** The genetic synchronizations, using  
239 thermosensitive (ts) *cdc* strains (Hartwell et al., 1973), were all performed starting from  
240 elutriated G1 daughter cells, released in temperature conditions designed to arrest the  
241 progression of the cycle at specific phases. The G1/S checkpoint synchronization was  
242 obtained using the YKL054 strain (carrying the *cdc6-1* mutation). The YKL054 was grown  
243 overnight at 25°C. Cells were then restarted in fresh media the next morning, and elutriated  
244 while in exponentially growing stage. The elutriated G1 cells were incubated in fresh YPD at  
245 the non-permissive temperature of 37°C for 3 h. The same procedure was employed to



246 synchronize cells during M phase, - in early (strain YKL052, *cdc14-3*) and late anaphase  
247 (strain YKL053, *cdc15-2*) states, respectively. Therefore, G1 cells of both YKL052 and  
248 YKL053 ts strains were incubated for 3 h at the non-permissive temperatures of 30°C and  
249 37°C before being processed for Hi-C. Moreover, to investigate the dynamics of mitotic exit  
250 and cell cycle reentry, several anaphase synchronized aliquots were shifted at the permissive  
251 temperatures of 23°C and 25°C and different time-points were taken (YKL052: 30 min;  
252 YKL053: 20 min, 40 min and 60 min). To study non-replicated mitotic chromosomes, the  
253 YKL054 strain was kept in non-permissive growing conditions for an extended period of 6 h.  
254 During this time lapse G1 cells bypassed the G1/S checkpoint and went directly into M phase  
255 without replicating their chromosomes. The synchrony of each time point (in G1/S, anaphase  
256 and release) was monitored with flow cytometry and microscopy.

257

258 **Synchronization through chemical compounds.** The chemical synchronization, as the  
259 genetic one, was performed on G1 elutriated cells. Synchronization at the G2/M transition  
260 was achieved by restarting G1 cells (strain YKL050) in YPD at 30°C for 1 h, followed by the  
261 addition of nocodazole (Calbiochem) 15 µg/ml and incubation for another 2 h at 30°C. Cells  
262 arrested in G2/M with nocodazole were either crosslinked, or washed and inoculated in fresh  
263 YPD at 30°C. The washing of nocodazole allowed G2/M synchronized cells to enter M phase,  
264 which was monitored at different time intervals (20 min, 45 min, 60 min and 90 min). For M  
265 phase synchronization in metaphase, we used the YKL051 strain (*MET3-HA-CDC20*). The  
266 YKL051 G1 elutriated cells were restarted in YPD complemented with 50 µg/ml methionine  
267 for 5 h at 30°C. Cells arrested in metaphase were split in different fractions: some were fixed  
268 for metaphase, other were washed and suspended in SC medium without methionine and  
269 different time-points were taken (20 min and 40 min). To study chromosome reorganization  
270 as a function of cohesin and condensin activity, we used YKL055 and YKL056 strains in  
271 which *SCC1* and *SMC2* genes, respectively, were tagged with an auxin-inducible degron (*aid*).  
272 Therefore, the degradation of these proteins was induced when auxin (IAA) was added to the  
273 medium at a final concentration of 20 µM. At first, both YKL055 and YKL056 were grown  
274 and elutriated in absence of IAA; then the G1 cells were restarted in YPD supplemented with  
275 IAA at 30°C. The cohesin *scc1-aid* mutant was processed for Hi-C in late S/G2 (see: release  
276 into S phase); while the *smc2-aid* was arrested in late anaphase using the coexistent *cdc15-2*  
277 mutations (see: synchronization through thermosensitive mutations). The synchrony of each  
278 time point was monitored with flow cytometry and microscopy. All the resulting  
279 synchronized time points were used to build Hi-C libraries.

280

281 **Flow cytometry.** About  $5 \times 10^6$  cells were fixed in ethanol 70% and stored at 4°C overnight.  
282 Cells were then pelleted, washed and incubated in sodium citrate 50 mM (pH 7.4)  
283 complemented with RNase A (10 mg/ml; Roche) for 2 h at 37°C. Next, Sytox green (2 μM  
284 in sodium citrate 50 mM; ThermoFisher) was added and cells incubated for 1 h at 4°C. Flow  
285 cytometry was performed on a MACSQuant Analyser (Miltenyi Biotec) and data was  
286 analyzed using FlowJo X 10.0.7 software (Tree Star).

287

288 **Microscopy.** Fractions of cells fixed in ethanol 70% and stored at 4°C overnight were  
289 pelleted and washed 3 times for 5 min in 1X PBS. Cells were permeabilized by immersion in  
290 0.2% Triton X-100 (Biosolve) for 5 min. To remove the triton, cells were pelleted and washed  
291 3 times in 1X PBS. The liquid was aspirated and cells were suspended in DAPI labeling  
292 solution (2 μg/ml in 1X PBS) for 10 min at room temperature. Before imaging acquisition, the  
293 labeling solution was aspirated and the cells were washed 3 times for 5 min in 1X PBS. Cells  
294 were imaged at 350 nm excitation wavelength with Nikon fluorescence microscope (Camera  
295 Andor Neo sCMOS, software Andor IQ2 2.7.1, LED Lumencor Spectra X).

296

297

298

## 299 **References**

300 Aragon, L., Martinez-Perez, E., and Merkschlager, M. (2013a). Condensin, cohesin and the  
301 control of chromatin states. *Current Opinion in Genetics & Development* 23, 204–211.

302 Aragon, L., Martinez-Perez, E., and Merkschlager, M. (2013b). Condensin, cohesin and the  
303 control of chromatin states. *Current Opinion in Genetics & Development* 23, 204–211.

304 Belton, J.-M., McCord, R.P., Gibcus, J.H., Naumova, N., Zhan, Y., and Dekker, J. (2012).  
305 Hi-C: A comprehensive technique to capture the conformation of genomes. *Methods* 58,  
306 268–276.

307 Blat, Y., and Kleckner, N. (1999). Cohesins Bind to Preferential Sites along Yeast  
308 Chromosome III, with Differential Regulation along Arms versus the Centric Region. *Cell* 98,  
309 249–259.

310 Clemente-Blanco, A., Mayán-Santos, M., Schneider, D.A., Machín, F., Jarmuz, A.,  
311 Tschochner, H., and Aragón, L. (2009). Cdc14 inhibits transcription by RNA polymerase I  
312 during anaphase. *Nature* 458, 219–222.

- 313 Cournac, A., Marie-Nelly, H., Marbouty, M., Koszul, R., and Mozziconacci, J. (2012).  
314 Normalization of a chromosomal contact map. *BMC Genomics* *13*, 436.
- 315 D'Amours, D., Stegmeier, F., and Amon, A. (2004). Cdc14 and Condensin Control the  
316 Dissolution of Cohesin-Independent Chromosome Linkages at Repeated DNA. *Cell* *117*,  
317 455–469.
- 318 Daoud, M., and Cotton, J.P. (1982). Star shaped polymers: a model for the conformation  
319 and its concentration dependence. *J. Phys. France* *43*, 531–538.
- 320 Dekker, J., Rippe, K., Dekker, M., and Kleckner, N. (2002). Capturing chromosome  
321 conformation. *Science* *295*, 1306–1311.
- 322 Glynn, E.F., Megee, P.C., Yu, H.-G., Mistrot, C., Unal, E., Koshland, D.E., DeRisi, J.L., and  
323 Gerton, J.L. (2004). Genome-Wide Mapping of the Cohesin Complex in the Yeast  
324 *Saccharomyces cerevisiae*. *PLOS Biol* *2*, e259.
- 325 Guacci, V., Hogan, E., and Koshland, D. (1994). Chromosome condensation and sister  
326 chromatid pairing in budding yeast. *J Cell Biol* *125*, 517–530.
- 327 Guidi, M., Ruault, M., Marbouty, M., Loiodice, I., Cournac, A., Billaudeau, C., Hocher, A.,  
328 Mozziconacci, J., Koszul, R., and Taddei, A. (2015). Spatial reorganization of telomeres in  
329 long-lived quiescent cells. *Genome Biology* *16*, 206.
- 330 Guillou, E., Ibarra, A., Coulon, V., Casado-Vela, J., Rico, D., Casal, I., Schwob, E., Losada,  
331 A., and Méndez, J. (2010). Cohesin organizes chromatin loops at DNA replication factories.  
332 *Genes Dev* *24*, 2812–2822.
- 333 Hartwell, L.H., Mortimer, R.K., Culotti, J., and Culotti, M. (1973). Genetic Control of the  
334 Cell Division Cycle in Yeast: V. Genetic Analysis of cdc Mutants. *Genetics* *74*, 267–286.
- 335 Hicks, S.C., and Irizarry, R.A. (2014). When to use Quantile Normalization? bioRxiv 012203.
- 336 Hirano, T. (2012). Condensins: universal organizers of chromosomes with diverse functions.  
337 *Genes Dev.* *26*, 1659–1678.
- 338 Humphrey, W., Dalke, A., and Schulten, K. (1996). VMD: visual molecular dynamics. *J Mol*  
339 *Graph* *14*, 33–38, 27–28.
- 340 Jacobs, C.W., Adams, A.E., Szaniszló, P.J., and Pringle, J.R. (1988). Functions of  
341 microtubules in the *Saccharomyces cerevisiae* cell cycle. *J Cell Biol* *107*, 1409–1426.
- 342 Kleckner, N., Fisher, J.K., Stouf, M., White, M.A., Bates, D., and Witz, G. (2014). The  
343 Bacterial Nucleoid: Nature, Dynamics and Sister Segregation. *Curr Opin Microbiol* *22*, 127–  
344 137.
- 345 Laloraya, S., Guacci, V., and Koshland, D. (2000). Chromosomal Addresses of the Cohesin  
346 Component Mcd1p. *J Cell Biol* *151*, 1047–1056.
- 347 Lesne, A., Riposo, J., Roger, P., Cournac, A., and Mozziconacci, J. (2014). 3D genome  
348 reconstruction from chromosomal contacts. *Nat Meth* *11*, 1141–1143.

- 349 Lieberman-Aiden, E., Berkum, N.L. van, Williams, L., Imakaev, M., Ragozy, T., Telling, A.,  
350 Amit, I., Lajoie, B.R., Sabo, P.J., Dorschner, M.O., et al. (2009). Comprehensive Mapping of  
351 Long-Range Interactions Reveals Folding Principles of the Human Genome. *Science* 326,  
352 289–293.
- 353 Marbouty, M., Ermont, C., Dujon, B., Richard, G.-F., and Koszul, R. (2014). Purification of  
354 G1 daughter cells from different *Saccharomyces* species through an optimized centrifugal  
355 elutriation procedure. *Yeast* 31, 159–166.
- 356 McCune, H.J., Danielson, L.S., Alvino, G.M., Collingwood, D., Delrow, J.J., Fangman, W.L.,  
357 Brewer, B.J., and Raghuraman, M.K. (2008). The temporal program of chromosome  
358 replication: genomewide replication in *clb5* $\Delta$  *Saccharomyces cerevisiae*. *Genetics* 180,  
359 1833–1847.
- 360 Mizuguchi, T., Fudenberg, G., Mehta, S., Belton, J.-M., Taneja, N., Folco, H.D., FitzGerald,  
361 P., Dekker, J., Mirny, L., Barrowman, J., et al. (2014). Cohesin-dependent globules and  
362 heterochromatin shape 3D genome architecture in *S. pombe*. *Nature* 516, 432–435.
- 363 Morlot, J.-B., Mozziconacci, J., and Lesne, A. (2016). Network concepts for analyzing 3D  
364 genome structure from chromosomal contact maps. *EPJ Nonlinear Biomedical Physics* 4, 2.
- 365 Naumova, N., Imakaev, M., Fudenberg, G., Zhan, Y., Lajoie, B.R., Mirny, L.A., and Dekker,  
366 J. (2013). Organization of the mitotic chromosome. *Science* 342, 948–953.
- 367 Piatti, S., Lengauer, C., and Nasmyth, K. (1995). Cdc6 is an unstable protein whose de novo  
368 synthesis in G1 is important for the onset of S phase and for preventing a “reductional”  
369 anaphase in the budding yeast *Saccharomyces cerevisiae*. *EMBO J* 14, 3788–3799.
- 370 Raghuraman, M.K., Winzeler, E.A., Collingwood, D., Hunt, S., Wodicka, L., Conway, A.,  
371 Lockhart, D.J., Davis, R.W., Brewer, B.J., and Fangman, W.L. (2001). Replication Dynamics  
372 of the Yeast Genome. *Science* 294, 115–121.
- 373 Renshaw, M.J., Ward, J.J., Kanemaki, M., Natsume, K., Nédélec, F.J., and Tanaka, T.U.  
374 (2010). Condensins Promote Chromosome Recoiling during Early Anaphase to Complete  
375 Sister Chromatid Separation. *Developmental Cell* 19, 232–244.
- 376 Rock, J.M., and Amon, A. (2011). Cdc15 integrates Tem1 GTPase-mediated spatial signals  
377 with Polo kinase-mediated temporal cues to activate mitotic exit. *Genes Dev* 25, 1943–1954.
- 378 Stephens, A.D., Haase, J., Vicci, L., Taylor, R.M., and Bloom, K. (2011). Cohesin, condensin,  
379 and the intramolecular centromere loop together generate the mitotic chromatin spring. *J. Cell*  
380 *Biol.* 193, 1167–1180.
- 381 Sullivan, M., Higuchi, T., Katis, V.L., and Uhlmann, F. (2004). Cdc14 Phosphatase Induces  
382 rDNA Condensation and Resolves Cohesin-Independent Cohesion during Budding Yeast  
383 Anaphase. *Cell* 117, 471–482.
- 384 Uhlmann, F. (2016). SMC complexes: from DNA to chromosomes. *Nat Rev Mol Cell Biol*  
385 17, 399–412.
- 386 Uhlmann, F., Lottspeich, F., and Nasmyth, K. (1999). Sister-chromatid separation at anaphase  
387 onset is promoted by cleavage of the cohesin subunit Scc1. *Nature* 400, 37–42.

388 Yoshida, S., Asakawa, K., and Toh-e, A. (2002). Mitotic Exit Network Controls the  
389 Localization of Cdc14 to the Spindle Pole Body in *Saccharomyces cerevisiae*. *Current*  
390 *Biology* 12, 944–950.

391 Yu, H. (2002). Regulation of APC–Cdc20 by the spindle checkpoint. *Current Opinion in Cell*  
392 *Biology* 14, 706–714.

393

394

### 395 **Supplementary information**

### 396 **Acknowledgements**

397 We thank Martial Marbouty and Axel Cournac for technical help in the earlier stage of this  
398 project, and Emmanuelle Fabre, Angela Taddei, Stephane Marcand, Thomas Guérin, Philippe  
399 Pasero, and Etienne Schwob for sharing strains and for discussions. Vittore Scolari and  
400 Heloise Muller were partly supported by Pasteur-Roux-Cantarini postdoctoral fellowships.  
401 This research was supported by funding to R.K. from the European Research Council under  
402 the 7th Framework Program (FP7/2007-2013, ERC grant agreement 260822), from Agence  
403 Nationale pour la Recherche (MeioRec ANR-13-BSV6-0012-02), and from ERASynBio and  
404 Agence Nationale pour la Recherche (IESY ANR-14-SYNB-0001-03).

### 405 **Authors Contributions**

406 LLS and RK designed research. LLS performed the experiment, with help from GM, AT and  
407 HM. VS and JM analyzed the data, with contributions from LLS. LLS, JM and RK interpreted  
408 the data and wrote the manuscript.

### 409 **Authors information**

410 Sample description and raw contact maps are accessible on the GEO database through the  
411 following accession number: xxx. Raw sequences are accessible on SRA database through the  
412 following accession number: xxx. The authors declare no competing financial interests.  
413 Correspondence and requests for materials should be addressed to R.K.  
414 (romain.koszul@pasteur.fr), or J.M. (mozziconacci@lptmc.jussieu.fr).

415

416

417

418

419 **Figures**

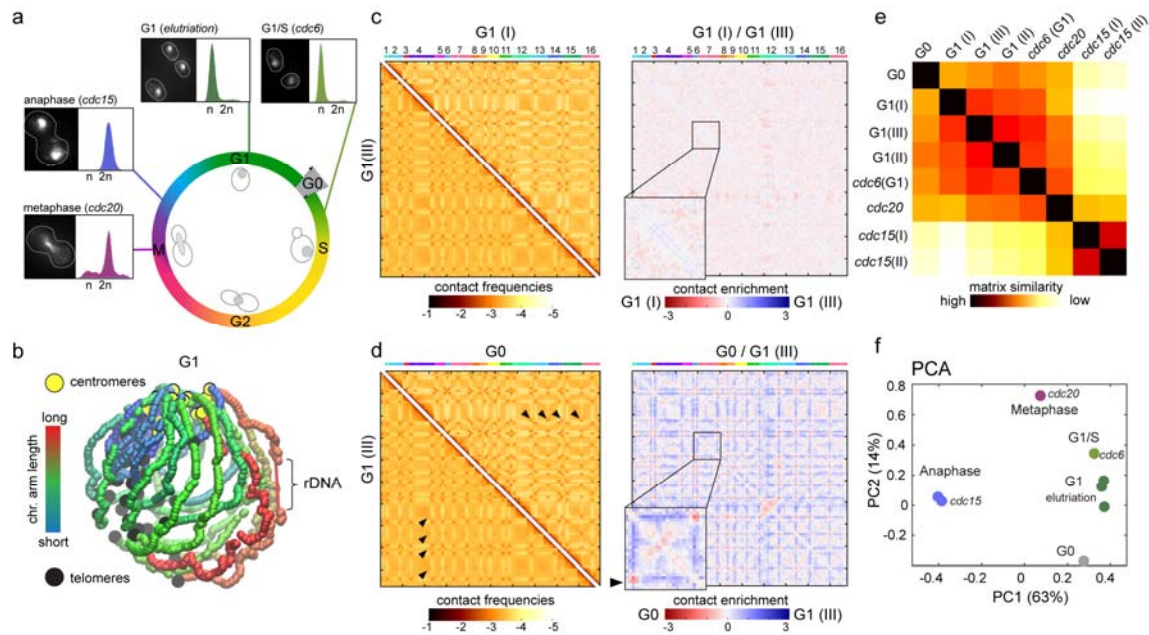

420

421 **Figure 1. Comparison of genome structures recovered from five synchronization procedures**  
 422 **over the cell cycle.**

423 (a) Overview of the different synchronization time-points with corresponding FACS profiles and  
 424 representative images of DAPI-stained cells. (b) 3D average representation of the Hi-C contact map of  
 425 a yeast G1 population. The color code reflects chromosomal arm lengths and centromeres, telomeres  
 426 and rDNA are highlighted. (c-d) Contact maps comparison. The 16 yeast chromosomes are displayed  
 427 atop the maps. Black arrowheads: inter-telomere contacts. Left panels display Hi-C maps obtained  
 428 from (c) two G1 cell populations synchronized independently and from (d) G1 and G0 populations.  
 429 Brown to yellow color scales reflect high to low contact frequencies, respectively (log10). Right  
 430 panels: log-ratio between each pair of maps. The left corner boxes display magnification of chr4. Blue  
 431 to red color scales reflect the enrichment in contacts in one population with respect to the other (log2).  
 432 (e) Pairwise Euclidian distances between contact maps of populations of G0, G1 synchronized either  
 433 with elutriation or blocked using a *cdc6* mutant, metaphase (*cdc20* mutant), and anaphase (*cdc15*  
 434 mutant) cells. Color code: contact map similarity. (f) Principal Component Analysis (PCA) of the  
 435 distance matrix in (e).

436



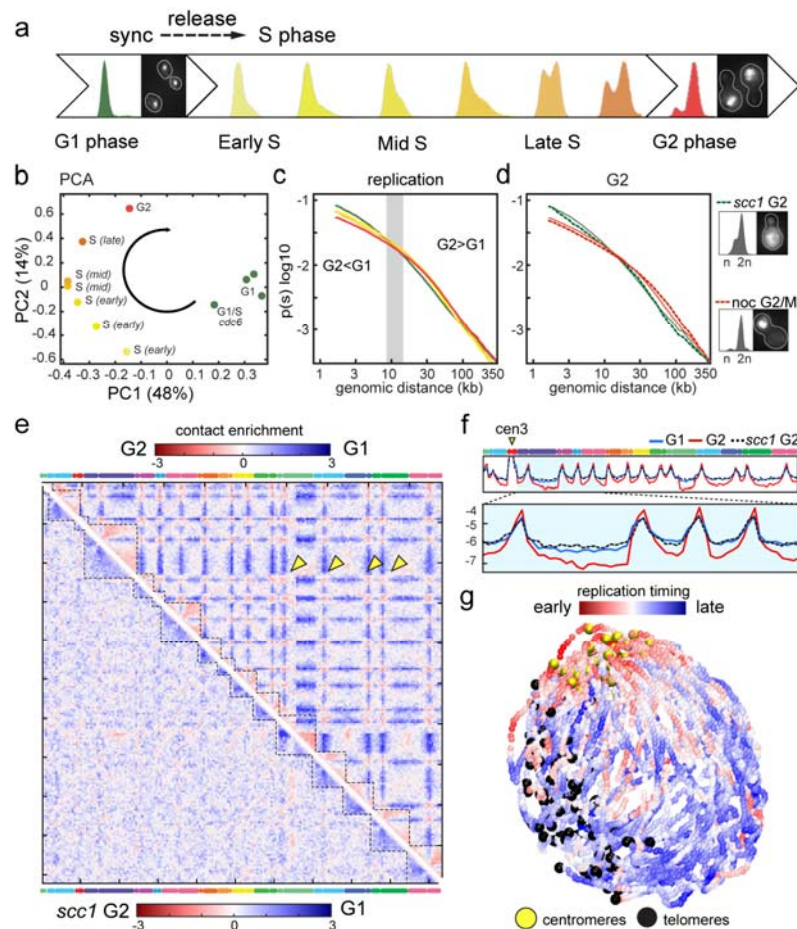

437

438 **Figure 2. Dynamic reorganization of chromosomes during replication.**

439 (a) FACS profiles and representative DAPI-stained cells of G1 synchronized cells released in S phase.  
 440 (b) PCA analysis of the distance matrix between the contact maps of the population displayed in (a).  
 441 (c)  $p(s)$ , i.e. average intra-chromosomal contact frequency ( $p$ ) between two loci with respect to their  
 442 genomic distance ( $s$ ) along the chromosome (log-log scale) during replication (color code is identical  
 443 to FACS profiles). (d)  $p(s)$  of cohesin depleted (*scc1* G2) and nocodazole arrested (*noc* G2/M) cells  
 444 are plotted as green and red dotted line, respectively. Corresponding FACS profiles and DAPI images  
 445 are displayed on the right of the graphs. (e-f) Log-ratio of contact maps between (top right) G2 and G1  
 446 cells (yellow arrowheads: centromere contacts) and *scc1* G2 and G1 cells (bottom left). Blue to red  
 447 color scales reflect the enrichment in contacts in one population with respect to the other ( $\log_2$ ). (f)  
 448 Normalized contact frequencies between chr3 centromere (*cen3*) and the rest of the genome for G1,  
 449 G2 and *scc1* G2. (g) Superposition of three 3D representations of chromosomes in early replication (I,  
 450 II, III). The color code indicates the replication timing. Centromeres and telomeres are highlighted.

451



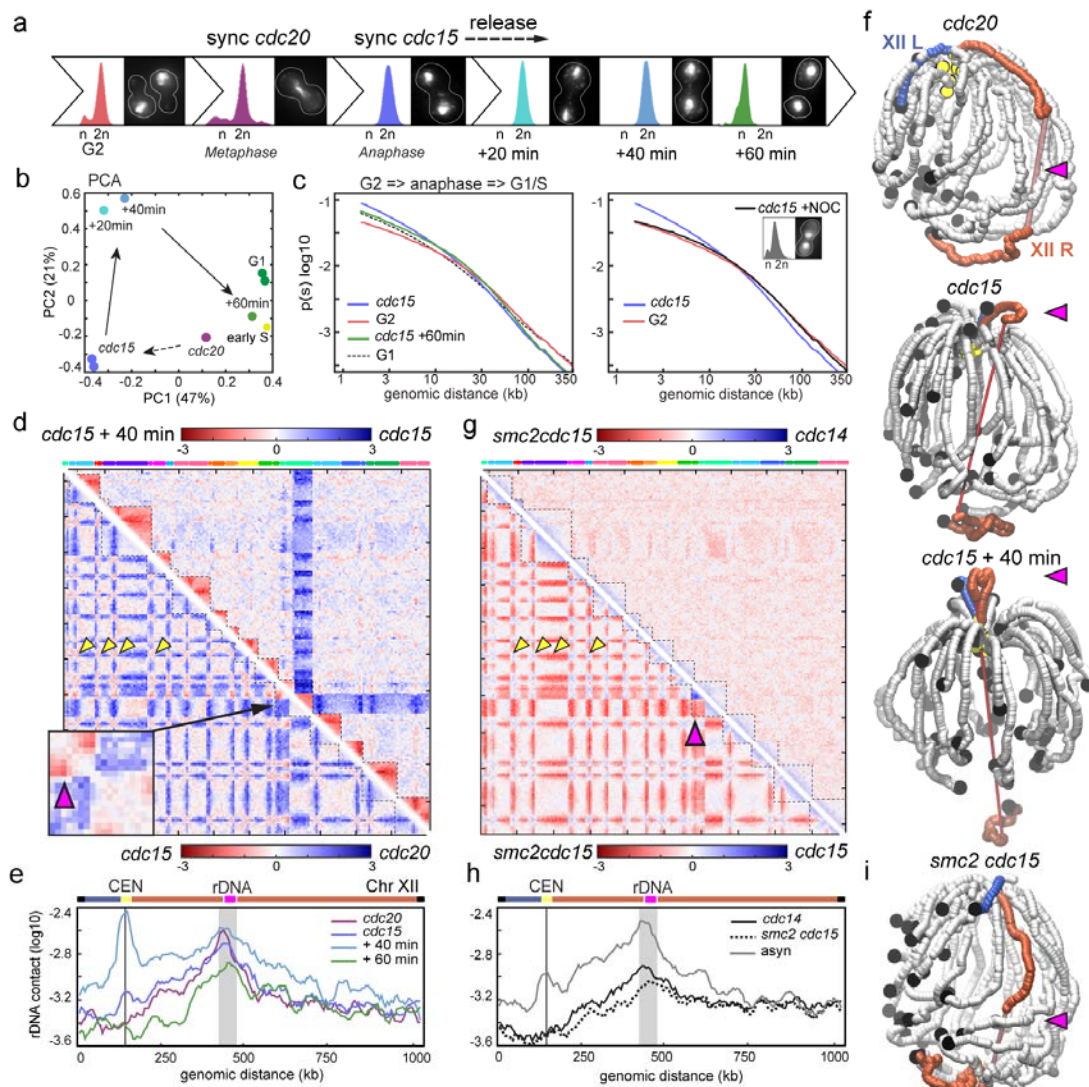

452

453 **Figure 3. Dynamic reorganization of chromosomes during segregation.** (a) FACS profiles and  
 454 representative DAPI-stained cells of synchronized and/or released populations, from G2 until reentry  
 455 in G1/S. (b) PCA analysis of the distance matrix between the contact maps of the populations  
 456 described in (a). (c) Left panel: p(s) of cells in G1, G2, anaphase (*cdc15*) and released from a *cdc15*-  
 457 block (60 minutes). Right panel: p(s) of G2, and *cdc15* blocked cells (anaphase) in absence or  
 458 presence of nocodazole (*cdc15*+NOC). (d) Log-ratio of contact maps between metaphase (*cdc20*) and  
 459 anaphase (*cdc15*) arrested cells (bottom left) and *cdc15* and anaphase released (*cdc15* + 40min) cells  
 460 (top right). Yellow arrowheads: inter-centromere contacts. Box: magnification of the contacts between  
 461 the rDNA flanking region and chr12 centromere (pink arrowhead). (e) Distribution of intra-  
 462 chromosomal contacts of a cen-proximal rDNA flanking region (highlighted in grey) with the rest of  
 463 chr12 in *cdc20*, *cdc15*, and *cdc15* release (black line: centromere). (f) 3D representations of the  
 464 contact maps from *cdc20*, *cdc15* arrested and *cdc15* released cells. The right (XIIR) and left (XIIL)  
 465 arms of chr12 are highlighted in red and blue, respectively. The pink arrowhead points at the right arm

466 anaphase loop. Centromeres, telomeres and rDNA are highlighted. (g) Log-ratio maps of cells blocked  
 467 in anaphase with or without condensin (*cdc15* vs. *smc2 cdc15* strain; bottom left) and of *cdc14* and  
 468 *smc2 cdc15* cells (top right). (h) Distribution of intra-chromosomal contacts of a cen-proximal rDNA  
 469 flanking region (highlighted in grey) with the rest of chr12 in *smc2 cdc15*, *cdc14* and asynchronous  
 470 contact map. (i) 3D representation of the contact map from *smc2 cdc15*.  
 471

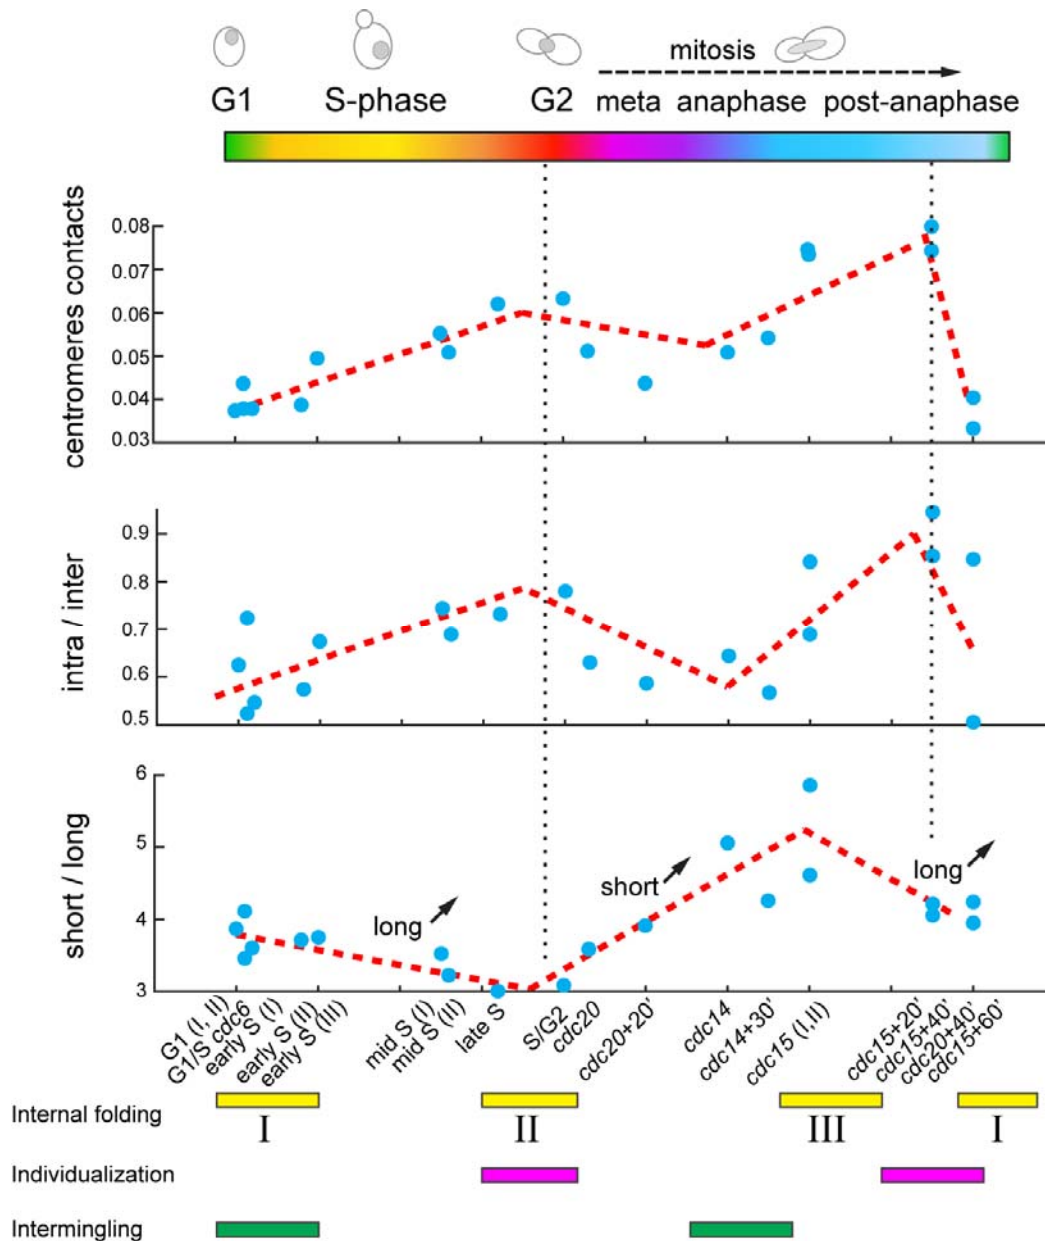

472

473 **Figure 4. Spatio-temporal reorganization of yeast genome.** Dynamics of centromere contacts,  
 474 intra/inter contact ratio and short/long contact ratio for each of the 20 time-points (blue dots), covering  
 475 the entire cell cycle (upper panel). Correlation with the three chromatin folding states (bottom panel).
